# Supplementary material for: Effects of Cr2O3 modification on the performance of SnO2 electrodes in DSSCs
Source: Royal Society of Chemistry journal article supplement (doi:10.1039/c2cp23545e), 2012-01-01
Supplement: c2cp23545e.pdf [file c2cp23545e.pdf]

# **Effects of Cr<sub>2</sub>O<sub>3</sub> modification on the performance of SnO<sub>2</sub> electrode in DSSCs**

Seo Yeong Choi, Min-Hye Kim, and Young-Uk Kwon\*

SKKU Advanced Institute of Nanotechnology, Research Institute of Advanced  
Nanomaterials, and Department of Chemistry and BK-21 School of Chemical Materials  
Science, Sungkyunkwan University, Suwon 440-746, Korea

Figure S1 shows the electrochemical impedance spectra of DSSCs under a  $100\text{mW}/\text{cm}^2$  illumination. The spectra include CrS-20 data that show much larger semicircle than any others.

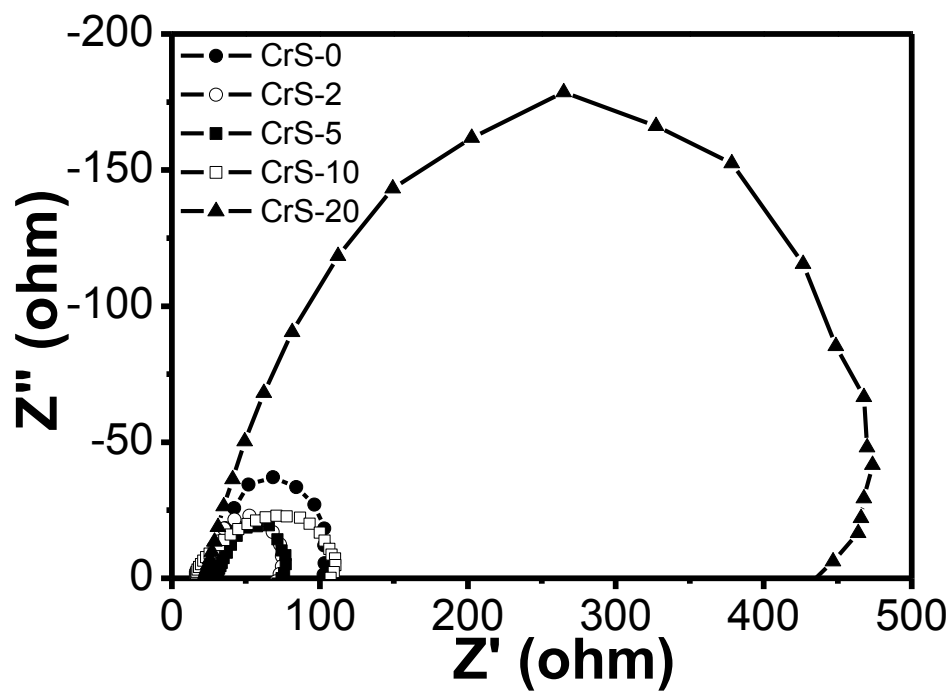

Figure S1. Electrochemical impedance spectra of DSSCs under a  $100\text{mW}/\text{cm}^2$  illumination
